1 Eukaryotic plankton community stability across reef environments in Bocas del Toro Archipelago  
2 (Panamá)

3

4 Andrea M. Rodas<sup>1</sup>, Logan K. Buie<sup>2</sup>, Hannah E. Aichelman<sup>1,2</sup>, Karl D. Castillo<sup>2,3</sup>, Rachel M.  
5 Wright<sup>1,4,5\*</sup>, Sarah W. Davies<sup>1\*</sup>

6

7 <sup>1</sup>Biology Department, Boston University, Boston, MA

8 <sup>2</sup>Department of Marine Sciences, University of North Carolina at Chapel Hill, Chapel Hill, NC

9 <sup>3</sup>Environment, Ecology and Energy Program, University of North Carolina at Chapel Hill, Chapel  
10 Hill, NC

11 <sup>4</sup>Department of Genetics, Harvard Medical School, Boston, MA

12 <sup>5</sup>Department of Biological Sciences, Smith College, Northampton, MA

13

14 \*corresponding authors: Sarah W. Davies [daviessw@bu.edu](mailto:daviessw@bu.edu); Rachel M. Wright  
15 [rwright@smith.edu](mailto:rwright@smith.edu)

16

17 **KEYWORDS:** coral reefs, plankton, diel vertical migration, phytoplankton, zooplankton, reef zone,  
18 metabarcoding, 18S

19 **ABSTRACT**

20 Variation in light and temperature can influence the genetic diversity and structure of marine  
21 plankton communities. While open ocean plankton communities receive much scientific attention,  
22 little is known about how environmental variation affects tropical coral reef plankton communities.  
23 Here, we characterize eukaryotic plankton communities on coral reefs across the Bocas del Toro  
24 Archipelago in Panamá. Temperature loggers were deployed for one year and mid-day light levels  
25 were measured to quantify environmental differences across reef zones at four inner and four outer  
26 reef sites: Inner: Punta Donato, Smithsonian Tropical Research Institute (STRI) Point, Cristobal,  
27 Punta Laurel and Outer: Drago Mar, Bastimentos North, Bastimentos South, and Popa Island.  
28 Triplicate vertical plankton tows were collected mid-day and high-throughput 18S ribosomal  
29 DNA metabarcoding was leveraged to investigate the relationship between eukaryotic plankton  
30 community structure and reef zones. Plankton communities from STRI Point were additionally  
31 characterized in the morning (~08:00), mid-day (~12:00), and evening (~16:00) to quantify diel  
32 variation within a single site. We found that inshore reefs experienced higher average seawater  
33 temperatures, while offshore sites offered higher light levels, presumably associated with reduced  
34 water turbidity on reefs further from shore. However, these significant reef zone-specific  
35 environmental differences did not correlate with overall plankton community differences or  
36 changes in plankton genetic diversity. Instead, we found that time of day within a site and diel  
37 vertical migration played structuring roles within these plankton communities, and therefore  
38 conclude that the time of community sampling is an important consideration for future studies.  
39 Overall, plankton communities in the Bocas del Toro Archipelago appear relatively well mixed  
40 across space; however, follow-up studies focusing on more intensive sampling efforts across space  
41 and time coupled with techniques that can detect more subtle genetic differences between and  
42 within communities will more fully capture plankton dynamics in this region.

## 43 INTRODUCTION

44           The diversity and abundance of marine plankton communities are well known to be  
45 affected by environmental variation including but not limited to temperature, nutrients, and light  
46 (Andersson et al. 1994; D’Croz et al. 2005). While open ocean and coastal plankton communities  
47 are relatively well-studied, plankton communities inhabiting oligotrophic tropical coral reefs have  
48 received far less attention, even though these reefs experience environmental variations that are  
49 likely to structure these communities across space and time. For example, organisms inhabiting  
50 different reef zones experience strongly divergent environmental conditions (Varela et al. 2001;  
51 Castillo et al. 2011; Siegel et al. 2013). Inshore reef zones generally experience greater  
52 environmental variation associated with changing tidal cycles, increased mean temperatures driven  
53 more restricted flow and shallower reef extent, and reduced salinities and increased turbidity  
54 associated with freshwater input from rivers and runoff (Lirman and Fong 2007). Offshore reefs  
55 are buffered by the open ocean and thus exhibit clearer seawater with more stable temperatures,  
56 resulting in enhanced light penetration generally favoring photosynthetic organisms (Boyer et al.  
57 2015). These physical differences in water quality parameters might be therefore expected to  
58 influence the structure of plankton communities on coral reefs. First, because there are species-  
59 specific thermal optima for plankton survival (Mauchline 1998), temperature differences across  
60 reef zones may play a strong role in structuring plankton communities. Additionally, as light levels  
61 are a major factor affecting phytoplankton growth (Harrison and Turpin 1982; Edwards et al.  
62 2016), spatial variation in light availability across reefs can have cascading food web effects that  
63 influence the entire ecosystem (Andersson et al. 1994; Barrera-Oro 2002).

64           Shifts in the structure of plankton communities are considered to be robust bioindicators  
65 of subtle environmental changes because species that comprise these communities have rapid life-

66 cycles that allow for quick responses to environmental perturbations (Hays et al. 2005; Richardson  
67 2008). For example, shifts in plankton distributions associated with warming waters were  
68 documented in the northeast Atlantic from 1959–2000 (Lindley and Daykin 2005). Furthermore,  
69 storms and upwelling events affect local water chemistry by introducing nutrient runoff from land,  
70 which can rapidly change the distribution of plankton, ultimately impacting their behavior and  
71 growth (Dunstall et al. 1990; Richmond and Woodin 1996). Plankton are also fundamental to a  
72 healthy food web, as they provide energy to higher trophic-level organisms such as marine birds,  
73 fish and corals (Fenchel 1988; Frederiksen et al. 2006). On coral reefs specifically, plankton are  
74 an important source of heterotrophic nutrition to corals. Heterotrophy has been shown to increase  
75 coral survival and recovery after heat stress (Johannes et al. 1970; Ferrier-Pagès et al. 2010;  
76 Hughes and Grottoli 2013; Tremblay et al. 2016) and to mitigate temperature-induced coral  
77 bleaching (Grottoli et al. 2006; Aichelman et al. 2016). However, few studies have examined how  
78 these important tropical coral reef plankton communities are influenced by environmental  
79 variation across different reef zones (Chiba et al. 2018).

80 Plankton community surveys began in the early 1800s when the first net suitable for  
81 sampling zooplankton was developed (Fraser 1968). Historically, plankton communities were  
82 characterized by microscopic examination of each microorganism (Johannes et al. 1970; Irigoien  
83 et al. 2004). This method relies on advanced taxonomic abilities of the observer to identify diverse  
84 species across different life stages as well as extensive time investment. Other methods for  
85 assessing plankton communities include measuring zooplankton organic biomass, which can offer  
86 insights into the overall abundance, but not the diversity or taxa-specific abundance, of the sampled  
87 community (D’Croz et al. 2005). Recent technological advancements in next-generation  
88 sequencing have provided a robust and reliable method to identify and characterize the diversity

89 and relative taxa abundances of plankton communities through high-throughput single locus  
90 metabarcoding sequencing (Albaina et al. 2016; Bucklin et al. 2016; Abad et al. 2016). In this  
91 approach, a genomic locus homologous across all Eukaryota is amplified and sequenced and  
92 unique taxa are identified as amplicon sequence variants (ASVs) based on some threshold of  
93 similarity in DNA sequence (Eiler et al. 2013; Lindeque et al. 2013; Kermarrec et al. 2014). This  
94 high-throughput analytical method provides information about species presence or absence and  
95 relative abundance, based on the number of observed reads mapping to any particular taxa, without  
96 the need for morphological examination. The precision of ASV identification by next-generation  
97 sequencing continuously improves as the databases used to identify species grow (Quast et al.  
98 2013).

99         Here, we characterized temperature and light environments of eight reef sites on inshore  
100 and offshore reef zones across the Bocas del Toro Archipelago in Panamá. We then leveraged 18S  
101 ribosomal DNA metabarcoding to gain quantitative insights into how these environmental  
102 conditions influence plankton communities across] these two different reef zones. In addition, we  
103 also assessed plankton communities at three timepoints (morning, mid-day, and late afternoon) at  
104 a single site to explore diel variations in plankton communities. Overall, these data help capture  
105 how heterotrophic opportunities on coral reefs might vary across space and time in this region,  
106 which can ultimately affect food webs dynamics in these marine environments.

107

## 108 **MATERIALS AND METHODS**

### 109 *Abiotic Environmental Conditions in Bocas del Toro*

110         To assess environmental differences across reef zones, we characterized thermal and light  
111 profiles at four inshore sites (Punta Donato, Smithsonian Tropical Research Institute [STRI] Point,

112 Cristobal, and Punta Laurel) and four offshore sites (Drago Mar, Bastimentos North, Bastimentos  
113 South, and Popa Island) within the Bocas del Toro Archipelago reef complex in Panamá (Fig. 1A).  
114 These eight sites were categorized as either inshore or offshore based on their distance from  
115 mainland Panamá (Fig. 1A; Table 1). Temperature conditions *in situ* were quantified by deploying  
116 data loggers (HOBO Pendant, Onset Computer Corporation) at each sampling site for  
117 approximately one year, and temperature data was recorded every fifteen minutes at each site for  
118 the duration of the deployment. Logger deployment began at the end of May (STRI Point and Popa  
119 Island) to early June (Punta Donato, Cristobal, and Drago Mar) in 2015 and loggers were retrieved  
120 in August 2016. Loggers from Cristobal, Punta Donato, STRI Point, Drago Mar, and Popa Island  
121 were retrieved, but loggers from Punta Laurel, Bastimentos North, and Bastimentos South were  
122 unable to be found and presumed lost. Temperature maximum, minimum, and daily range were  
123 averaged over the deployment period for each site where loggers were retrieved (Table 2). Mean  
124 daily maximum temperature between June 15–30 were used as a proxy for conditions experienced  
125 during plankton community sampling.

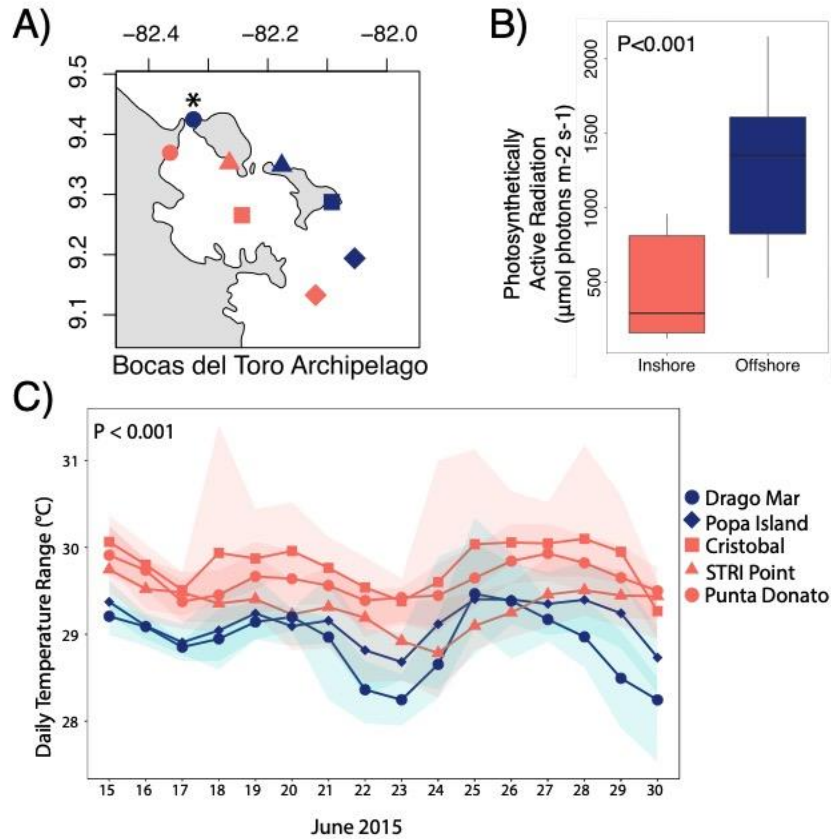

126  
127 **Fig. 1. Environmental conditions in Bocas del Toro.** (A) Location of collection sites. Symbols  
128 indicate site: Punta Donato = salmon circle, STRI Point = salmon triangle, Cristobal = salmon  
129 square, Punta Laurel = salmon diamond, Drago Mar = blue circle, Bastimentos North = blue  
130 triangle, Bastimentos South = blue square, Popa Island = blue diamond. (B) Mean maximum daily  
131 light values averaged across reef zone. Error bars indicate the minimum and maximum light levels.  
132 (C) Daily temperature ranges for each site (inshore = salmon, offshore = blue). Symbols represent  
133 mean temperatures. Shaded regions encompass the maximum and minimum values for each site.  
134 P-value indicates that inshore reef sites are significantly warmer than offshore reef sites. Drago  
135 Mar is additionally indicated with a \* to correspond with Figure 2B.  
136

137 Table 1: Plankton sampling sites on the Bocas Del Toro Archipelago, Panamá including reef zone,  
138 latitude, longitude and date of collection.

| Site              | Zone     | Lat(°N) | Long(°W) | Date                        |
|-------------------|----------|---------|----------|-----------------------------|
| Punta Donato      | Inshore  | 9.41815 | 82.34412 | 6/5/15                      |
| STRI Point        | Inshore  | 9.35198 | 82.26627 | 5/27/15<br>6/3/15<br>6/4/15 |
| Cristobal         | Inshore  | 9.26237 | 82.2409  | 6/4/15                      |
| Punta Laurel      | Inshore  | 9.13277 | 82.11958 | 6/3/15                      |
| Bastimentos North | Offshore | 9.34798 | 82.16798 | 5/29/15                     |
| Bastimentos South | Offshore | 9.28747 | 82.09232 | 5/30/15                     |
| Popa Island       | Offshore | 9.1836  | 82.04942 | 5/31/15                     |
| Drago Mar         | Offshore | 9.4246  | 82.32468 | 6/1/15                      |

139

140 An underwater  $2\pi$  Quantum Sensor (LI-192, LI-COR Inc.) was used to measure  
141 photosynthetically active radiation (PAR) for all sites at the time of plankton sample collections  
142 with the exception of Cristobal due to consistently overcast conditions. For the remaining sites,  
143 PAR levels were measured every thirty seconds between the hours of approximately 10 a.m. and  
144 2 p.m. on sampling days. To account for variations in daily cloud cover, only the maximum twenty  
145 PAR measurements collected from each site were used to compare differences across reef types  
146 and reef sites (Table 2). A one-way ANOVA (R Development Core Team 2018) was used to test  
147 for differences in mean light level and daily maximum temperature across reef zones (Fig. 1C, B).

148

#### 149 *Plankton Community Collections and 18S Metabarcoding Preparations*

150 Between 27 May 2015 and 5 June 2015, three replicate vertical plankton tows were  
151 conducted at each of the eight sites using a plankton net with 0.5 m diameter and 60  $\mu$ m mesh  
152 filter. Filtered water was then passed through an additional 100  $\mu$ m filter to concentrate collections



153 and samples were preserved in 200 proof ethanol at a volume of 50 mL. Samples were brought  
154 back to the laboratory at the University of North Carolina at Chapel Hill and maintained at -20°C  
155 until DNA isolation.

156 Two replicate DNA isolations were completed for each plankton tow following the  
157 extraction method described in Davies et al. (2013). A subset of each well-mixed plankton sample  
158 (1.5 mL) was centrifuged to pellet plankton, after which ethanol was decanted. Plankton were then  
159 immersed in DNA digest buffer (100 mM NaCl, 10 mM Tris-Cl pH 8.0, 25 mM EDTA pH 8.0,  
160 0.5 % SDS 5 µL Proteinase-K) for 1 hour at 42°C followed by a standard phenol-chloroform  
161 extraction procedure. In brief, an equal volume of 25:24:1 buffer-saturated  
162 phenol:chloroform:isoamyl alcohol (PCA) was added to the sample, centrifuged, and the resulting  
163 aqueous layer was separated. PCA separation was repeated two additional times to further clean  
164 the sample and reduce PCR inhibition. DNA was precipitated using 100% ethanol and 3M NaOAc,  
165 rinsed with 80% ethanol, and then resuspended in 50 µL milliQ water. DNA concentrations were  
166 quantified using a Nanodrop (model ND1000, Thermo Scientific) and all extracts were visualized  
167 on 1% agarose gels to assess DNA integrity.

168 The 18S rRNA region was targeted in each plankton community using original primers  
169 from Stoeck et al. (2010), which were then modified for compatibility with Illumina MiSeq. The  
170 forward primer sequence was 5'-TCTCGGCGCTCAGATGTGTATAAGAGACAGNNNNCCAGC  
171 **ASCYGC GGTAATTCC**-3' and the reverse primer sequence was GTCTCGTGGGCTCGGAGA  
172 *TGTGTATAAGAGACAGNNNN***ACTTTCGTTCTTGAT**-3' where the text in bold is the 18S  
173 target, italics represents linker sequence and underlined text represents Illumina adapter linker  
174 sequences, which bind to Illumina adapters during the second PCR (ESM Fig. 1). Each 20 µL  
175 polymerase chain reaction (PCR) mixture contained 0.2 mM dNTP mix, 0.5 U *Extaq* polymerase

176 (Takara Biotechnology), 2.0  $\mu$ L 10X *Extaq* buffer, 100 ng of DNA template, 0.1  $\mu$ M forward and  
177 reverse primer mix, and 12.4  $\mu$ L milliQ water. PCR amplification was performed using the  
178 following profile: 95°C for 5 minutes, followed by 20 cycles of 95°C for 40 seconds, 59°C for 2  
179 minutes, and 72°C for 1 minute, and then an extension period of 7 minutes at 72°C. To avoid PCR  
180 biases, samples were cycle checked as per Quigley et al. (2014) to ensure that all samples were  
181 amplified to an equivalent intensity when visualized on a 2% agarose gel. Samples that failed to  
182 amplify during were diluted 10 $\times$  with milliQ water, which yielded successful amplification in all  
183 cases. PCR products were purified using a GeneJET PCR purification kit (Fermentas Life  
184 Sciences). A second PCR was then performed to incorporate unique barcodes and Illumina  
185 adapters into each sample for Illumina MiSeq sequencing following Baumann et al. (2017). The  
186 PCR thermal profile for this barcode reaction was the same as that described above; however, only  
187 four cycles were used. All samples were then visualized together on the same agarose gel and  
188 differing volumes of each barcoded sample were pooled based on band intensities. The resulting  
189 pooled library was run on a 1.5% agarose gel and the band was excised and soaked in 30  $\mu$ L milliQ  
190 overnight at 4°C. The liquid eluate was sequenced at University of North Carolina at Chapel Hill's  
191 High-Throughput Sequencing Facility using Illumina MiSeq paired-end 300 base pair (bp)  
192 sequencing. All raw reads are archived in the National Center for Biotechnology Information  
193 (NCBI) Short Read Archive (SRA) under accession number PRJNA507270.

194

### 195 ***Plankton Community Analysis***

196 The R statistical environment (R Development Core Team 2018) was used for all data  
197 analyses. Scripts for all environmental and sequencing analyses and all environmental data can be  
198 accessed at <https://github.com/rachelwright8/planktonCommunities>. We implemented the *dada2*

199 package to characterize plankton community genetic diversity and structure (Callahan et al. 2016).  
200 First, FASTQ files were trimmed for sequence lengths of 250 bp for forward reads and 200 bp for  
201 reverse reads based on quality of reads. The first 24 bp from forward reads and 19 bp from reverse  
202 reads (representing primer sequence) and all base pairs with quality scores less than or equal to  
203 twenty were truncated from all reads. Identical reads were dereplicated, then matching forward  
204 and reverse reads were merged. Merged sequences with lengths outside the 365–386 bp range were  
205 removed from the analysis as likely products of non-specific primer binding. Chimeric sequences  
206 were also removed, resulting in a total of 39% of the original reads remaining (ESM Table 2;  
207 Supplemental Files 1 & 2), which were then assigned taxonomy from the Silva database version  
208 123 (<https://www.arb-silva.de>) using the assignTaxonomy function in *dada2*, with minimum  
209 bootstrap confidences of 5 for assigning a taxonomic level. Minimum bootstrap confidences of 50  
210 were also tested and we observed identical results at both taxonomic levels (taxonomic identities  
211 can be found in Supplemental File 3). All downstream analyses here are reported on the bootstrap  
212 confidence of 5.

213         The package *phyloseq* was used to create an amplicon sequence variant (ASV) per sample  
214 counts table (McMurdie and Holmes 2013). The ASV file was then separated for all mid-day  
215 samples and STRI Point time course samples for two separate sets of analyses. The R package  
216 *MCMC.OTU* was used to purge rare ASVs that appeared in fewer than 1% of all samples per Green  
217 et al. (2014). ASV count data were then log-normalized and principal coordinate analysis (PCoA)  
218 was used to compare plankton communities between reef zones, sites, and time of day using the R  
219 package *vegan* (Oksanen et al. 2018). The *adonis* function was used to test for differences in  
220 plankton communities across these factors. Lastly, Simpson and Shannon diversities for each

221 plankton sample were calculated using *phyloseq* and then these differences in diversity across reef  
222 zones, sites and time of day were compared using ANOVA and Tukey's HSD tests.

223

### 224 ***Variation in Specific Plankton Taxa***

225 Differential abundance analyses were performed on ASV counts using DESeq2 (Love et al. 2016).

226 Two negative binomial models were fit to test for differentially abundant ASVs by reef zone and

227 time of day using the models ASV count ~ reef zone and ASV count ~ time, respectively. Raw

228 ASV counts are available in Supplementary Files 1 (reef zone) and 2 (time of day). Counts were

229 normalized for size factor differences and a pairwise contrast was computed for inshore and

230 offshore reef zones and between all three pairwise comparisons for time of day. An FDR adjusted

231  $p < 0.05$  (Benjamini and Hochberg 1995) represents significantly different abundances. To

232 visualize these differences, raw counts were rlog normalized and heatmaps with hierarchical

233 clustering of abundance profiles were created with the *pheatmap* package (Kolde 2018). DESeq2

234 results are available in Supplemental Files 4 (reef zone) and 5 (time of day) and taxonomic

235 assignment results can be found in Supplemental File 3.

236

## 237 **RESULTS**

### 238 ***Divergent Environmental Conditions across Bocas del Toro Reef Zones***

239 Temperature loggers were retrieved from five of eight sites. Maximum daily temperatures

240 over the first two weeks of deployment were significantly higher at inshore sites than offshore sites

241 ( $p < 0.001$ ; Fig. 1C). Average temperature and standard error for the first two weeks of deployment

242 at inshore sites was  $30.02 \pm 0.07^\circ\text{C}$  while the offshore sites had an average of  $29.37 \pm 0.08^\circ\text{C}$ . The

243 top twenty PAR values ( $\mu\text{mol photons m}^{-2} \text{s}^{-1}$ ) recorded at each site show that *in situ* light levels

244 at inshore sites were significantly lower ( $438 \pm 38 \mu\text{mol photons m}^{-2} \text{s}^{-1}$ ) than offshore sites (1213  
245  $\pm 54 \mu\text{mol photons m}^{-2} \text{s}^{-1}$ ) ( $p < 0.001$ ; Fig. 1B). Overall, inshore sites are warmer and experience  
246 lower light levels when compared to offshore sites on Bocas del Toro reefs.

247 Table 2: Mean light values (top 20 PAR values) and mean daily temperature maximums +/- SE  
248 from 15–30 June 2015 for each reef site where plankton collections were conducted. Cristobal  
249 does not have a light value because it was too cloudy on the day of sampling. The HOBO loggers  
250 for Punta Laurel, Bastimentos North, and Bastimentos South reef sites were lost during their year  
251 of deployment so no temperature data are available for these sites.

| Site              | Mean PAR ( $\mu\text{mol photons m}^{-2} \text{s}^{-1}$ ) | Daily Max Temperature ( $^{\circ}\text{C}$ ) |
|-------------------|-----------------------------------------------------------|----------------------------------------------|
| Punta Donato      | 326 $\pm$ 15                                              | 29.9 $\pm$ 0.06                              |
| STRI Point        | 151 $\pm$ 6                                               | 29.7 $\pm$ 0.05                              |
| Cristobal         | -                                                         | 30.4 $\pm$ 0.14                              |
| Punta Laurel      | 838 $\pm$ 8                                               | -                                            |
| Bastimentos North | 562 $\pm$ 8                                               | -                                            |
| Bastimentos South | 1673 $\pm$ 45                                             | -                                            |
| Popa Island       | 1578 $\pm$ 48                                             | 29.5 $\pm$ 0.08                              |
| Drago Mar         | 1040 $\pm$ 39                                             | 29.2 $\pm$ 0.12                              |

252

### 253 *Plankton Communities Do Not Differ Across Reef Zones*

254 Principal coordinate analysis (PCoA) revealed that overall plankton communities were not  
255 significantly different ( $p = 0.256$ , Fig. 2A) between inshore and offshore reef zones. Also, inshore  
256 and offshore reef zones did not differ in mean Shannon's Index of Diversity (H) ( $p = 0.178$ ) or  
257 mean Simpson's Index of Diversity (D) ( $p = 0.19$ ) (Fig. 2B&C). Although overall plankton  
258 communities did not differ by reef zone, there were several taxa significantly enriched in either  
259 inshore or offshore reef zones ( $N = 18$ ), with inshore reef sites exhibiting enrichment of 4 taxa  
260 compared to offshore sites exhibiting enrichment of 14 taxa (Fig. 2B). In particular, three out of  
261 the four enriched taxa in the inshore sites were photosynthetic organisms (highlighted in green  
262 text; Fig 2B). It is also worth noting that Drago Mar exhibited taxa abundance profiles more similar

263 to inshore sites (starred samples; Fig. 2B), which is interesting given its relative proximity to shore  
 264 relative to other offshore sites (Fig. 1A).

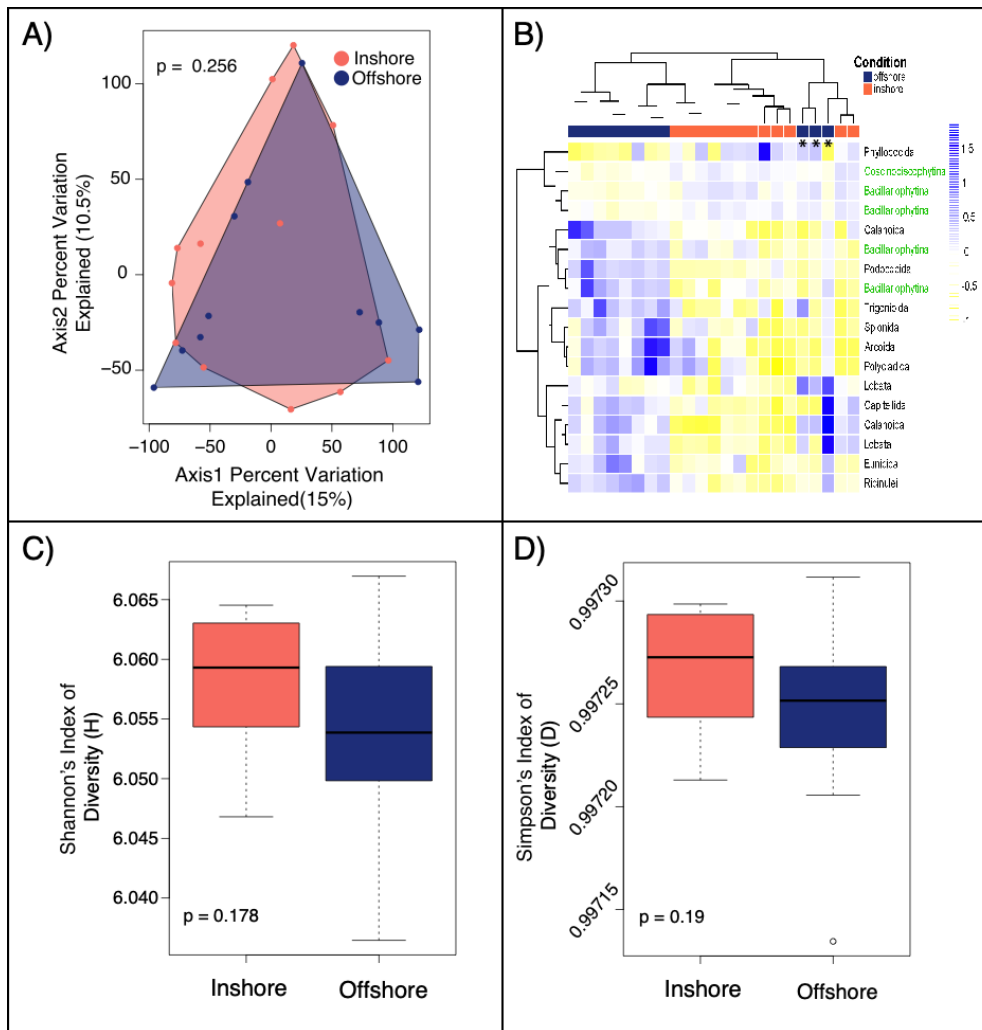

265

266 **Fig. 2. Variation in mid-day plankton samples by reef zone.** (A) Principal coordinate analysis  
 267 of plankton communities by reef zone (inshore/offshore). Percentages on each axis indicate the  
 268 amount of variation explained by each axis (Inshore = salmon, offshore = blue). P-value indicates  
 269 results from the *Adonis* test. (B) Heatmap of the most differentially abundant taxa across the two  
 270 different reef zones. Coral and blue blocks indicate that libraries originated from inshore and  
 271 offshore plankton communities, respectively. Columns represent unique plankton tows and rows  
 272 represent differentially abundant taxa. \* symbols indicate libraries originating from Drago Mar.  
 273 Taxa listed in black are heterotrophic whereas taxa listed in green are autotrophic. The color scale  
 274 is in log<sub>2</sub> (blue: enriched, yellow: depleted) and taxa and samples are clustered hierarchically based  
 275 on Pearson's correlation of their relative abundance across samples. (C) Mean Shannon and (D)  
 276 Simpson diversity of plankton communities based on reef zone. P-values demonstrate that there  
 277 were no statistical differences in diversity across reef zone.

278 ***No Reef Site-specific Differences in Plankton Communities***

279           PCoA grouped by individual reef site indicated that there were no significant differences  
280 in plankton communities across individual sites ( $p = 0.509$ ; ESM Fig. S2A). Furthermore, no  
281 significant differences in diversity between sites based on mean Shannon's Index of Diversity ( $p$   
282  $= 0.297$ ; ESM Fig. S2B) or mean Simpson's Index of Diversity ( $p = 0.385$ ; ESM Fig. S2C) were  
283 observed. For diversity indices, means for most sites ranged from 6.05–6.06 for Shannon and  
284 0.99725–0.99727 for Simpson, with the exception of Popa Island, which exhibited the lowest mean  
285 diversity for both indices (Shannon: 6.04, Simpson: 0.99720; ESM Fig. S2B, C).

286

287 ***Time of Day Significantly Influenced Plankton Community Composition***

288           PCoA analysis partitioned by time of day revealed that there was a significant shift in  
289 plankton community structure across different times of day at STRI Point (early, mid-day, and  
290 late;  $p = 0.003$ ; Fig. 3A). These time course differences were driven by mid-day plankton  
291 communities, which were distinct from plankton communities observed at early and late times of  
292 day (Fig. 3A). Plankton samples collected mid-day exhibited the least variation in community  
293 composition between its three replicate tows (Fig. 3A). However, these differences in overall  
294 plankton community were not the result of changes in diversity given that neither the Shannon's  
295 Index of Diversity ( $p = 0.607$ ) nor the Simpson's Indexes of Diversity ( $p = 0.552$ ) showed  
296 significant differences in plankton community diversity across time of day (Fig. 3B, C).

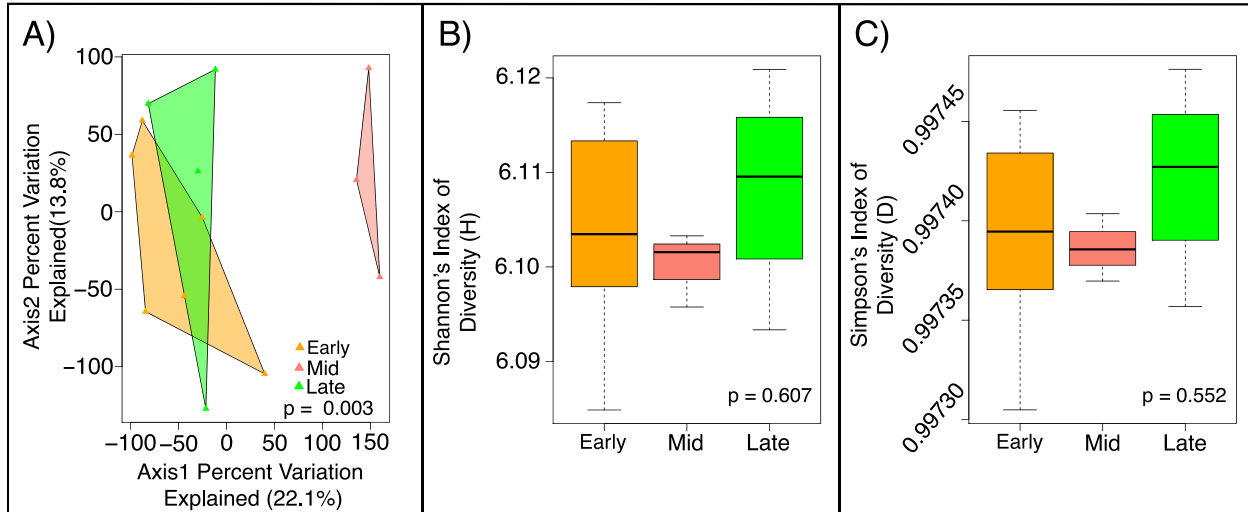

297

298 **Fig. 3. STRI Point plankton samples clustered by time of day (Early, Mid-day, Late)** (A)  
299 Principal coordinate analysis of plankton communities by time of day at STRI Point. Percentages  
300 on each axis indicate the amount of variation explained by each axis. Early = orange, Mid-day =  
301 pink and Late = green. *Adonis* P-value demonstrates that there was a significant statistical  
302 difference in community composition across reef zones. (B) Mean Shannon and (C) Simpson  
303 diversity of plankton communities based on time of day. P-values demonstrate that there were no  
304 statistical differences in diversity across time of day and error bars represent the minimum and  
305 maximum indices of diversity.

306

307 Heatmaps of the most differentially abundant ASVs highlight the taxonomic orders driving

308 the observed overall community shifts between sampling timepoints (Fig 4A, B). We observe

309 several phytoplankton ASVs (Orders Bacillariophytina [diatoms], Syndiniales, and

310 Peridiniphycidae) that are enriched mid-day compared to early or late, while other photosynthetic

311 taxa (e.g., other Bacillariophytina and Zoantharia [zoanths]) are enriched in the early and late

312 timepoints, highlighting the complexity of diel vertical migrations observed on these reefs.



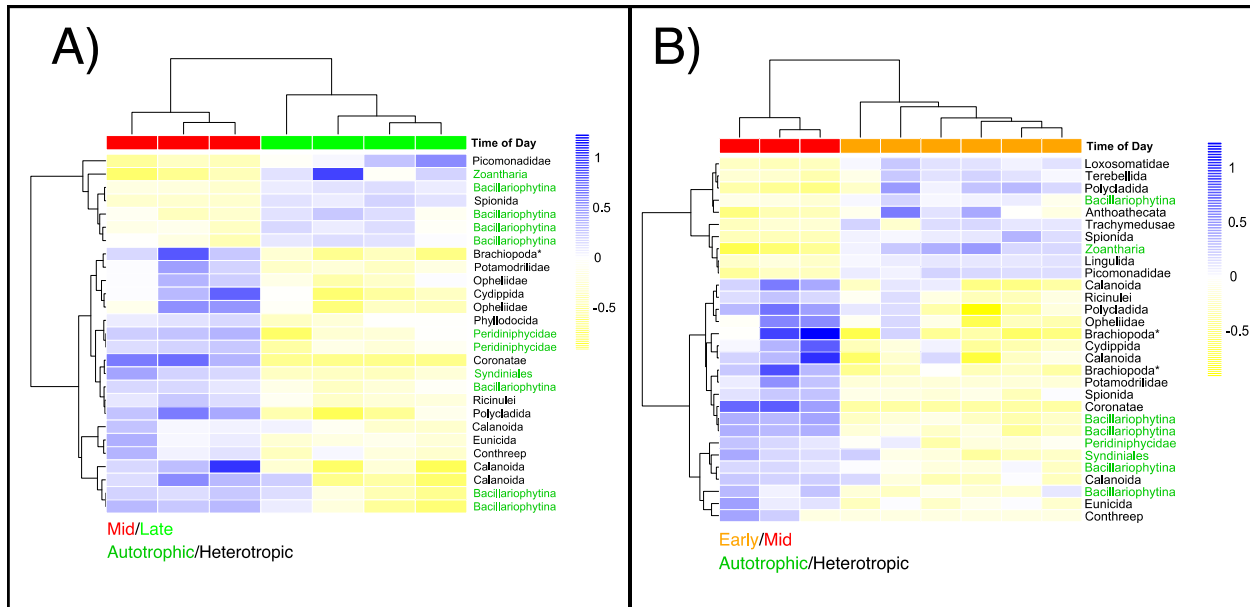

313  
 314 **Fig. 4. Diel Variation in specific plankton taxa.** (A–B) Heatmaps of the most differentially abundant taxa between early and mid-day sampling. Asterisks are for ASVs that could only be  
 315 abundant taxa between early and mid-day sampling. Asterisks are for ASVs that could only be  
 316 identified to its phylum level instead of order like the rest. (A) and between mid-day and late  
 317 sampling (B). Red, orange and green blocks indicate that libraries originated from plankton  
 318 communities collected mid-day, early or late, respectively. Columns represent unique plankton  
 319 tows and rows represent differentially abundant taxa. Taxa listed in black are heterotrophic  
 320 whereas taxa listed in green are autotrophic. The color scale is in log<sub>2</sub> (blue: enriched, yellow:  
 321 depleted) and taxa and samples are clustered hierarchically based on Pearson's correlation of their  
 322 relative abundance across samples.  
 323

## 324 DISCUSSION

### 325 *Environmental Differences Across Reef Zones*

326 It has been well established that inshore and offshore reef zones differ in their  
 327 environmental conditions across space and time. Inshore reefs experience increased turbidity,  
 328 sedimentation, nutrients, and temperature variation, while offshore reefs are characterized by more  
 329 moderate temperatures and lower turbidity as they are buffered by the open ocean (Boyer &  
 330 Briceño 2011; Lirman & Fong 2007; Lirman et al. 2011). Here we show that the inshore and  
 331 offshore reef zones on coral reefs in the Bocas del Toro Archipelago, Panamá are consistent with  
 332 these expected environmental differences, with inshore reefs exhibiting lower light levels and  
 333 warmer temperatures compared to offshore reef sites (Fig. 1). Warmer inshore waters and higher

334 turbidity (i.e. reduced light) are also consistent with *in situ* data measured on other Caribbean reef  
335 tracts, including Belize (Castillo et al., 2012; Baumann et al., 2016) and Florida (Kenkel et al.,  
336 2017; Rippe et al., 2018). These differences in mean mid-day light values and temperature are  
337 expected to drive niche specialization across marine environments, with specific taxa exhibiting  
338 preferences for distinct reef environments (Edwards et al. 2016; Andersson et al. 1994; Takasuka  
339 et al. 2005).

340

### 341 ***Plankton Community Show Few Differences Across Reef Zones***

342         Although we observed significant differences in light and temperature across inshore and  
343 offshore reef zones (Fig. 1), these environmental variations did not correspond with overall  
344 differences in plankton communities (Fig. 2). This result is surprising given that on larger scales,  
345 it has been estimated that variation in sea-surface temperature explains roughly 90% of the  
346 geographic variation in plankton diversity throughout the Atlantic Ocean (Rutherford et al. 1999)  
347 and it has been shown that plankton communities can be affected by even finer-scale  
348 environmental variations including depth, temperature and trophic state of the water (i.e.  
349 particulate concentration, nutrients, and chlorophyll-*a*) (Owen 1989). This lack of plankton  
350 community structure observed here may suggest that the processes structuring plankton  
351 communities in this archipelago operate at much larger spatiotemporal scales than the scale  
352 investigated here. However, there are also several confounding hypotheses that may serve to  
353 reconcile these results.

354         First, the results presented here are based solely on sequencing data from three single point  
355 measurements in space and time on a single day at a specific reef site. With the exception of STRI  
356 Point, we do not consider temporal changes at these sites across days, and it is possible that our

357 point collections do not accurately represent the average plankton community observed at these  
358 sites. Given that previous work has shown that kinetic properties of water influence planktonic  
359 organization (Mackenzie and Leggett 1991) and marine plankton communities can be more  
360 dispersed in high-energy, turbulent environments (Haury et al. 1990), it is possible that weather  
361 related influences during the days of sampling (e.g., wind) could have acted to homogenize  
362 plankton communities across sites. It is also possible that samples taken in a different season, as  
363 in the study by (Huang et al. 2004) could yield different results. Furthermore, our collections were  
364 also conducted using a 60  $\mu\text{m}$  net, which excludes the sampling of smaller organisms, so it is also  
365 possible that community differences exist at smaller size fractions that were outside of the scope  
366 of this study. Lastly, we only measured temperature and light to assess environmental differences  
367 across reef zones and it could be that other physical and biochemical properties that were not  
368 measured here are stronger drivers of these tropical coastal plankton communities, like nutrient  
369 runoff from the mainland (D’Croz et al. 2005) and long term climate change (De Stasio et al.  
370 1996).

371 Another important consideration is that sequencing plankton communities introduces its  
372 own set of caveats, including the fact that rDNA copy number per cell varies by orders of  
373 magnitude across unicellular eukaryotes (e.g., dinoflagellates and ciliates) (Weider et al. 2005;  
374 Gong et al. 2013). Therefore, caution must be exercised when interpreting organism abundance  
375 based on rDNA sequence abundance. Variation in rDNA copy number can even occur within a  
376 species and a recent single-cell sequencing study found that rDNA and rRNA copy number scaled  
377 with cell size in two ciliate species (Fu and Gong 2017), so variation in plankton size, which was  
378 not measured here, could have influenced relative abundances. Equally plausible, plankton  
379 communities across these sites may be homogenous but the functional processes within each group

380 of taxa may differ transcriptionally across sites, which has been previously observed in diatoms in  
381 response to iron availability (Cohen et al. 2017) and in dinoflagellates in response to light  
382 environment (Davies et al. 2018). We also leveraged 18S rDNA sequencing, which is known to  
383 be highly conserved across taxa, but this single locus approach overlooks any sort of within-species  
384 population genetic differences that may exist between sites (Rodríguez et al. 2005; Martiny et al.  
385 2009).

386         Given these caveats, we propose that future studies should couple more traditional  
387 microscopy techniques with 18S rDNA sequencing and perhaps consider a multidisciplinary  
388 approach incorporating metatranscriptomics or population genetics of specific taxa of interest in  
389 order to capture potential ecological and functional differences between plankton communities  
390 across reef zones.

391

### 392 *Time of Day Played a Role in Structuring Plankton Communities*

393         Despite not finding differences in overall plankton community structure across reef zones,  
394 we did observe differences across time of day within the STRI Point site. We observed differences  
395 in overall community structure (Fig. 3A), reduced variation in diversity indices (Fig. 3B,C), and  
396 differentially enriched taxa over the course of the sampling day (Fig. 4A,B), which are all likely  
397 the result of diel vertical migration (DVM) of both phytoplankton and zooplankton. DVM is the  
398 movement of plankton and fish vertically in the water column over a daily cycle. For zooplankton,  
399 these movements are most commonly (but not always) up to the surface at dusk and back to the  
400 deeper waters at dawn (Lampert 1989; Ohman 1990; Brierley 2014) in order to avoid predation  
401 pressures (Ohman 1988; Lampert 1989). Planktivorous fishes are visual hunters, and most species  
402 inhabiting nearshore environments have been found to feed during the day, thus exerting a diurnal

403 predation pressure on plankton (Morgan 1990; Motro et al. 2005). Predation pressure of  
404 planktivorous fishes on zooplankton is also strong on coral reefs (Hamner et al. 1988), and has  
405 been shown to drive vertical patterns of zooplankton in these habitats (Motro et al. 2005).  
406 Specifically in Bocas del Toro, Kerr et al. (2014) demonstrated that predation risk is higher during  
407 the day than at night for *Artemia franciscana* nauplii. However, the temporal gradient in planktonic  
408 predation risk was dependent on prey life history stage (i.e., size), as adult *A. franciscana* did not  
409 show predation differences across the diurnal cycle (Kerr et al. 2014). While the “normal”  
410 zooplankton migration is considered to be ascending in the evening and descending in the morning,  
411 examples of “reversed” migrations are also common (Lampert 1989; Ohman 1990), with migration  
412 patterns varying by whether predation pressure is from visually hunting planktivorous fishes or  
413 nocturnally feeding zooplankton (Ohman 1990). Here, we find evidence for both normal and  
414 reversed patterns of zooplankton migration at the STRI Point site, with some zooplankton taxa  
415 enriched at mid-day and some enriched earlier/later in the day.

416 We also found evidence of phytoplankton DVM in Bocas del Toro, as some taxa were  
417 enriched at mid-day and some were enriched in either the morning or evening. Phytoplankton  
418 DVM is generally understood as a mechanism for these organisms to optimize light and nutrient  
419 gradients, therefore moving into shallower waters during the day to photosynthesize and moving  
420 deeper in the water column at night to uptake nutrients (Raven and Richardson 1984; Ault 2000).  
421 As photosynthetic characteristics of phytoplankton vary, optimum depth and migration pattern  
422 varies by the underwater light pattern and the organism being considered (Ault 2000). As with  
423 zooplankton, we found evidence of both the normal migration and reversed migration patterns.  
424 Some phytoplankton sampled appeared to be migrating up to surface waters at mid-day (e.g.,  
425 Bacillariophytina [diatoms], Syndiniales, and Peridiniphyceidae). However, other taxa (e.g., other

426 Bacillariophytina and Zoantharia [zoanthids]) were enriched in the morning/evening, suggesting  
427 that they were migrating away from surface waters during mid-day (Fig 5). This reversed pattern  
428 is likely evidence of these organisms migrating away from high noon-time irradiance in order to  
429 avoid photoinhibition (Anderson and Stolzenbach 1985; Kingston 1999; Flynn and Fasham 2002).  
430 However, as our analyses can only distinguish to the level of Order, it is difficult to interpret the  
431 factors influencing the patterns observed for both phytoplankton and zooplankton.

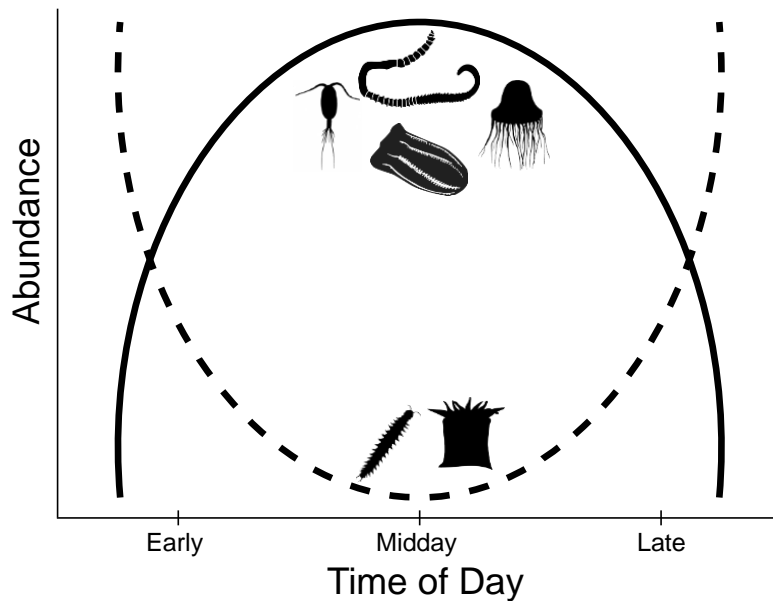

432  
433 **Fig. 5. Conceptual Model for Diel Community Shifts in Plankton Communities at STRI**  
434 **Point.** Based on our data, Cydippida, Eunicida, Coronatae, and Calanoida taxa are more abundant  
435 mid-day, which are represented by the solid line, and Spionida and Zoantharia are more abundant  
436 during early and late time frames, which are represented by the dashed line.

437

### 438 *Concluding Thoughts*

439 Tracking plankton community composition through space and time is critical as climate  
440 change progresses. Correlating the environmental conditions experienced in Bocas del Toro to the  
441 plankton communities across these sites builds a baseline dataset upon which future studies can  
442 build in order to assess how changing environments are influencing these communities. Current  
443 estimates suggest that the oceans have warmed by ca. 0.6°C over the past 100 years (IPCC, 2007)

444 and have absorbed almost 50% of all the anthropogenic CO<sub>2</sub> emitted over the last 250 years  
445 (Sabine *et al.*, 2004), and as the oceans continue to change, the need to characterize baseline  
446 community structure is imminent. Plankton not only play a central and critical role in the health  
447 and productivity of the oceans, but can also serve as sensitive indicators of climate change. As  
448 plankton communities shift in response to climate change, the availability of energy for other  
449 trophic levels will also shift, which will undoubtedly modulate food web dynamics. Therefore, a  
450 more comprehensive description of baseline plankton communities provided by studies like the  
451 one presented here are needed before we can make accurate projections of what impacts these  
452 climate-mediated shifts in plankton communities will have on future reefs.

453

454 **Conflict of Interest:** On behalf of all authors, the corresponding authors state that there are no  
455 conflicts of interest.

456

457 **Acknowledgements:** We acknowledge the Government of Panamá, Ministerio de Ambiente and  
458 STRI for all permitting (#SE/A-28-15 and #SEX/AO-2-15) and coordination of fieldwork. We  
459 thank the Marchetti Laboratory at the UNC Chapel Hill for providing molecular lab space and  
460 thoughtful discussions. Lastly, we thank J.P Rippe, Colleen Bove, Justin Baumann, and Clare  
461 Fieseler for fieldwork assistance. Funding was provided by the National Science Foundation  
462 (NSF) grant OCE-1459522 to K.D.C, a UNC Summer Undergraduate Research Fellowship to  
463 L.K.B., A.M.R. was supported by NSF-REU grant BIO-1659605, and start-up funds from  
464 Boston University to S.W.D.

## 465 REFERENCES

- 466 Abad D, Albaina A, Aguirre M, Laza-Martínez A, Uriarte I, Iriarte A, Villate F, Estonba A  
467 (2016) Is metabarcoding suitable for estuarine plankton monitoring? A comparative study  
468 with microscopy. *Mar Biol* 163:149. doi: 10.1007/s00227-016-2920-0
- 469 Aichelman HE, Townsend JE, Courtney TA, Baumann JH, Davies SW, Castillo KD (2016)  
470 Heterotrophy mitigates the response of the temperate coral *Oculina arbuscula* to  
471 temperature stress. *Ecol Evol* 6:6758–6769. doi: 10.1002/ece3.2399
- 472 Albaina A, Aguirre M, Abad D, Santos M, Estonba A (2016) 18S rRNA V9 metabarcoding for  
473 diet characterization: a critical evaluation with two sympatric zooplanktivorous fish species.  
474 *Ecol Evol* 6:1809–1824. doi: 10.1002/ece3.1986
- 475 Anderson D, Stolzenbach K (1985) Selective retention of two dinoflagellates in a well-mixed  
476 estuarine embayment: the importance of diel vertical migration and surface avoidance. *Mar*  
477 *Ecol Prog Ser* 25:39–50. doi: 10.3354/meps025039
- 478 Andersson A, Haecky P, Hagstrom A (1994) Effect of temperature and light on the growth of  
479 micro- nano- and pico-phytoplankton: impact on algal succession. *Mar Biol* 120:511–520.
- 480 Ault TR (2000) Vertical migration by the marine dinoflagellate *Prorocentrum triestinum*  
481 maximises photosynthetic yield. *Oecologia* 125:466–475. doi: 10.1007/s004420000472
- 482 Barrera-Oro E (2002) The role of fish in the Antarctic marine food web: differences between  
483 inshore and offshore waters in the southern Scotia Arc and west Antarctic Peninsula.  
484 *Antarct Sci* 14:293–309. doi: 10.1017/S0954102002000111
- 485 Baumann JH, Davies SW, Aichelman HE, Castillo KD (2017) Coral Symbiodinium Community  
486 Composition Across the Belize Mesoamerican Barrier Reef System is Influenced by Host  
487 Species and Thermal Variability. *Microb Ecol* 75:903–915. doi: 10.1007/s00248-017-1096-  
488 6
- 489 Benjamini Y, Hochberg Y (1995) Controlling the False Discovery Rate: A Practical and  
490 Powerful Approach to Multiple Testing. *J R Stat Soc Ser B* 57:289–300. doi:  
491 10.1111/j.2517-6161.1995.tb02031.x
- 492 Boyer JN, Briceño HO, And Briceño HO (2015) 2015 Annual Report of the Water Quality  
493 Monitoring Project for the Water Quality Protection Program of the Florida Keys National  
494 Marine Sanctuary.
- 495 Brierley AS (2014) Diel vertical migration. *Curr Biol* 24:1074–1076. doi:  
496 10.1016/j.cub.2014.08.054
- 497 Bucklin A, Lindeque PK, Rodriguez-Ezpeleta N, Albaina A, Lehtiniemi M (2016)  
498 Metabarcoding of marine zooplankton: Prospects, progress and pitfalls. *J Plankton Res*  
499 38:393–400. doi: 10.1093/plankt/fbw023
- 500 Callahan BJ, McMurdie PJ, Rosen MJ, Han AW, Johnson AJA, Holmes SP (2016) DADA2:  
501 High-resolution sample inference from Illumina amplicon data. *Nat Methods* 13:581–583.  
502 doi: 10.1038/nmeth.3869
- 503 Castillo KD, Ries JB, Weiss JM (2011) Declining coral skeletal extension for forereef colonies  
504 of *Siderastrea siderea* on the Mesoamerican barrier reef system, Southern Belize. *PLoS*  
505 *One*. doi: 10.1371/journal.pone.0014615



- 506 Chiba S, Batten S, Martin CS, Ivory S, Miloslavich P, Weatherdon L V (2018) Zooplankton  
507 monitoring to contribute towards addressing global biodiversity conservation challenges. *J*  
508 *Plankton Res* 40:509–518. doi: 10.1093/plankt/fby030
- 509 Cohen NR, Brzezinski MA, Twining KTBS, Ellis KA, Lampe RH, McNair H, Till CP,  
510 Maldonado MT, Kuzminov FI, Bargu S, Sunda WG, Bruland KW, Marchetti A (2017)  
511 Diatom transcriptional and physiological responses to changes in iron bioavailability across  
512 ocean provinces. *Front Mar Sci*. doi: 10.3389/fmars.2017.00360
- 513 D’Croz L, Del Rosario JB, Góndola P (2005) The effect of fresh water runoff on the distribution  
514 of dissolved inorganic nutrients and plankton in the Bocas del Toro Archipelago,  
515 Caribbean Panama. *Caribb J Sci* 41:414–429.
- 516 Davies SW, Rahman M, Meyer E, Green EA, Buschiazio E, Medina M, Matz M V. (2013)  
517 Novel polymorphic microsatellite markers for population genetics of the endangered  
518 Caribbean star coral, *Montastraea faveolata*. *Mar Biodivers*. doi: 10.1007/s12526-012-0133-  
519 4
- 520 Davies SW, Ries JB, Marchetti A, Castillo KD (2018) Symbiodinium Functional Diversity in the  
521 Coral *Siderastrea siderea* Is Influenced by Thermal Stress and Reef Environment, but Not  
522 Ocean Acidification. *Front Mar Sci*. doi: 10.3389/fmars.2018.00150
- 523 De Stasio BT, Hill DK, Kleinhans JM, Nibbelink NP, Magnuson JJ (1996) Potential effects of  
524 global climate change on small north-temperate lakes: Physics, fish, and plankton. *Limnol*  
525 *Oceanogr*. doi: 10.4319/lo.1996.41.5.1136
- 526 Dunstall TC, Carter CH, Monroe BP, Haymes GT, Weiler RR, Hopkins CJ (1990) Influence of  
527 Upwelling, Storms, and Generating Station Operation on Water Chemistry and Plankton in  
528 the Nanticoke Region of Long Point Bay, Lake Erie. *Can J Fish Aquat Sci* 47:1434–1445.  
529 doi: 10.1139/f90-162
- 530 Edwards KF, Thomas MK, Klausmeier CA, Litchman E (2016) Phytoplankton growth and the  
531 interaction of light and temperature: A synthesis at the species and community level.  
532 *Limnol Oceanogr* 61:1232–1244. doi: 10.1002/lno.10282
- 533 Eiler A, Drakare S, Bertilsson S, Pernthaler J, Peura S, Rofner C, Simek K, Yang Y, Znachor P,  
534 Lindström ES (2013) Unveiling Distribution Patterns of Freshwater Phytoplankton by a  
535 Next Generation Sequencing Based Approach. *PLoS One* 8:e53516. doi:  
536 10.1371/journal.pone.0053516
- 537 Fenchel T (1988) Marine Plankton Food Chains. *Annu Rev Ecol Syst* 19:19–38.
- 538 Ferrier-Pagès C, Rottier C, Beraud E, Levy O (2010) Experimental assessment of the feeding  
539 effort of three scleractinian coral species during a thermal stress: Effect on the rates of  
540 photosynthesis. *J Exp Mar Bio Ecol* 390:118–124. doi: 10.1016/j.jembe.2010.05.007
- 541 Flynn KJ, Fasham MJR (2002) A modelling exploration of vertical migration by phytoplankton.  
542 *J Theor Biol* 218:471–484. doi: 10.1016/S0022-5193(02)93093-6
- 543 Fraser J (1968) The history of plankton sampling. In: Tranter JD (ed) *Zooplankton Sampling*.  
544 United Nations Educational, Scientific, and Cultural Organization, pp 11–18
- 545 Frederiksen M, Edwards M, Richardson AJ, Halliday NC, Wanless S (2006) From plankton to  
546 top predators: Bottom-up control of a marine food web across four trophic levels. *J Anim*  
547 *Ecol* 75:1259–1268. doi: 10.1111/j.1365-2656.2006.01148.x

- 548 Fu R, Gong J (2017) Single Cell Analysis Linking Ribosomal (r)DNA and rRNA Copy Numbers  
549 to Cell Size and Growth Rate Provides Insights into Molecular Protistan Ecology. *J*  
550 *Eukaryot Microbiol* 64:885–896. doi: 10.1111/jeu.12425
- 551 Gong J, Dong J, Liu X, Massana R (2013) Extremely High Copy Numbers and Polymorphisms  
552 of the rDNA Operon Estimated from Single Cell Analysis of Oligotrich and Peritrich  
553 Ciliates. *Protist* 164:369–379. doi: 10.1016/j.protis.2012.11.006
- 554 Green EA, Davies SW, Matz M V., Medina M (2014) Quantifying cryptic Symbiodinium  
555 diversity within *Orbicella faveolata* and *Orbicella franksi* at the Flower Garden Banks, Gulf  
556 of Mexico. *PeerJ* 2:e386. doi: 10.7717/peerj.386
- 557 Grottoli AG, Rodrigues LJ, Palardy JE (2006) Heterotrophic plasticity and resilience in bleached  
558 corals. *Nature* 440:1186–1189. doi: 10.1038/nature04565
- 559 Hamner WM, Jones MS, Carleton JH, Hauri IR, Williams DM (1988) Zooplankton,  
560 planktivorous fish, and water currents on a windward reef face: Great Barrier Reef,  
561 Australia. *Bull Mar Sci* 42:459–479.
- 562 Harrison PJ, Turpin DH (1982) The Manipulation of Physical, Chemical, and Biological Factors  
563 to Select Species from Natural Phytoplankton Communities. In: Grice GD, Reeve MR (eds)  
564 *Marine Mesocosms: Biological and Chemical Research in Experimental Ecosystems*.  
565 Springer US, New York, NY, pp 275–289
- 566 Haury LR, Yamazaki H, Itsweire EC (1990) Effects of turbulent shear flow on zooplankton  
567 distribution. *Deep Sea Res Part A, Oceanogr Res Pap* 37:447–461. doi: 10.1016/0198-  
568 0149(90)90019-R
- 569 Hays GC, Richardson AJ, Robinson C (2005) Climate change and marine plankton. *Trends Ecol*  
570 *Evol* 20:337–344. doi: 10.1016/J.TREE.2005.03.004
- 571 Huang L, Jian W, Song X, Huang X, Liu S, Qian P, Yin K, Wu M (2004) Species diversity and  
572 distribution for phytoplankton of the Pearl River estuary during rainy and dry seasons. *Mar*  
573 *Pollut Bull*. doi: 10.1016/j.marpolbul.2004.03.015
- 574 Hughes AD, Grottoli AG (2013) Heterotrophic Compensation: A Possible Mechanism for  
575 Resilience of Coral Reefs to Global Warming or a Sign of Prolonged Stress? *PLoS One*  
576 8:e81172. doi: 10.1371/journal.pone.0081172
- 577 Irigoien X, Huisman J, Harris RP (2004) Global biodiversity patterns of marine phytoplankton  
578 and zooplankton. *Nature* 429:863–867. doi: 10.1038/nature02593
- 579 Johannes RE, Coles SL, Kuenzel NT (1970) The Role of Zooplankton in the Nutrition of Some  
580 Scleractinian Corals. *Limnol Oceanogr* 15:579–586. doi: 10.4319/lo.1970.15.4.0579
- 581 Kermarrec L, Franc A, Rimet F, Chaumeil P, Frigerio J-M, Humbert J-F, Bouchez A (2014) A  
582 next-generation sequencing approach to river biomonitoring using benthic diatoms. *Freshw*  
583 *Sci* 33:349–363. doi: 10.1086/675079
- 584 Kerr KA, Cornejo A, Guichard F, Collin R (2014) Planktonic predation risk varies with prey life  
585 history stage and diurnal phase. *Mar Ecol Prog Ser* 503:99–109. doi: 10.3354/meps10735
- 586 Kingston MB (1999) Effect of light on vertical migration and photosynthesis of *Euglena proxima*  
587 (*Euglenophyta*). *J Phycol* 35:245–253. doi: 10.1046/j.1529-8817.1999.3520245.x
- 588 Kolde R (2018) pheatmap : Pretty Heatmaps. R Packag version 1010. doi:

- 589 10.1023/B:RUGE.0000004135.76637.8e
- 590 Lampert W (1989) The Adaptive Significance of Diel Vertical Migration of Zooplankton. *Funct*  
591 *Ecol* 3:21–27. doi: 10.2307/2389671
- 592 Lindeque PK, Parry HE, Harmer RA, Somerfield PJ, Atkinson A (2013) Next Generation  
593 Sequencing Reveals the Hidden Diversity of Zooplankton Assemblages. *PLoS One*  
594 8:e81327. doi: 10.1371/journal.pone.0081327
- 595 Lindley JA, Daykin S (2005) Variations in the distributions of *Centropages chierchiae* and  
596 *Temora stylifera* (Copepoda: Calanoida) in the north-eastern Atlantic Ocean and western  
597 European shelf waters. *ICES J Mar Sci* 62:869–877. doi: 10.1016/j.icesjms.2005.02.009
- 598 Lirman D, Fong P (2007) Is proximity to land-based sources of coral stressors an appropriate  
599 measure of risk to coral reefs? An example from the Florida Reef Tract. *Mar Pollut Bull*  
600 54:779–791. doi: 10.1016/j.marpolbul.2006.12.014
- 601 Love MI, Anders S, Huber W (2016) DESeq2 vignette. *Genome Biol.* doi: 110.1186/s13059-  
602 014-0550-8
- 603 Mackenzie BR, Leggett WC (1991) Quantifying the contribution of small-scale turbulence to the  
604 encounter rates between larval fish and their zooplankton prey: effects of wind and tide.  
605 *Mar Ecol Prog Ser* 73:149–160. doi: 10.3354/meps073149
- 606 Martiny AC, Tai APK, Veneziano D, Primeau F, Chisholm SW (2009) Taxonomic resolution,  
607 ecotypes and the biogeography of *Prochlorococcus*. *Environ Microbiol* 11:823–832. doi:  
608 10.1111/j.1462-2920.2008.01803.x
- 609 Mauchline J (1998) *The biology of calanoid copepods: Introduction.*, 1st edn.
- 610 McMurdie PJ, Holmes S (2013) Phyloseq: An R Package for Reproducible Interactive Analysis  
611 and Graphics of Microbiome Census Data. *PLoS One* 8:e61217. doi:  
612 10.1371/journal.pone.0061217
- 613 Morgan SG (1990) Impact of planktivorous fishes on dispersal, hatching, and morphology of  
614 estuarine crab larvae. *Ecology* 71:1639–1652. doi: 10.2307/1937574
- 615 Motro R, Ayalon I, Genin A (2005) Near-bottom depletion of zooplankton over coral reefs: III:  
616 Vertical gradient of predation pressure. *Coral Reefs* 24:95–98. doi: 10.1007/s00338-004-  
617 0451-5
- 618 Ohman MD (1988) Behavioral responses of zooplankton to predation. *Bull Mar Sci* 43:530–550.
- 619 Ohman MD (1990) The demographic benefits of diel vertical migration by zooplankton. *Ecol*  
620 *Monogr* 60:257–281. doi: 10.2307/1943058
- 621 Oksanen J, Blanchet FG, Friendly M, Kindt R, Legendre P, McGlinn D, Minchin PR, O’Hara  
622 RB, Simpson GL, Solymos P, Stevens MHH, Szoecs E, Wagner H (2018) *Vegan:*  
623 *Community Ecology Package.*
- 624 Owen RW (1989) Microscale and finescale variations of small plankton in coastal and pelagic  
625 environments. *J Mar Res* 47:197–240. doi: 10.1357/002224089785076415
- 626 Quast C, Pruesse E, Yilmaz P, Gerken J, Schweer T, Yarza P, Peplies J, Glöckner FO (2013) The  
627 SILVA ribosomal RNA gene database project: Improved data processing and web-based  
628 tools. *Nucleic Acids Res* 41:D590–D596. doi: 10.1093/nar/gks1219

- 629 Quigley KM, Davies SW, Kenkel CD, Willis BL, Matz M V., Bay LK (2014) Deep-sequencing  
630 method for quantifying background abundances of Symbiodinium types: Exploring the rare  
631 Symbiodinium biosphere in reef-building corals. *PLoS One* 9:e94297. doi:  
632 10.1371/journal.pone.0094297
- 633 R Development Core Team . (2011) R: A Language and Environment for Statistical Computing.  
634 *R Found Stat Comput.* doi: 10.1007/978-3-540-74686-7
- 635 Raven JA, Richardson K (1984) DINOPHYTE FLAGELLA: A COST-BENEFIT ANALYSIS.  
636 *New Phytol* 98:259–276. doi: 10.1111/j.1469-8137.1984.tb02736.x
- 637 Richardson AJ (2008) In hot water: zooplankton and climate change. *ICES J Mar Sci* 65:279–  
638 295. doi: 10.1093/icesjms/fsn028
- 639 Richmond CE, Woodin SA (1996) Short-term fluctuations in salinity: Effects on planktonic  
640 invertebrate larvae. *Mar Ecol Prog Ser* 133:167–177. doi: 10.3354/meps133167
- 641 Rodríguez F, Derelle E, Guillou L, Le Gall F, Vaultot D, Moreau H (2005) Ecotype diversity in  
642 the marine picoeukaryote *Ostreococcus* (Chlorophyta, Prasinophyceae). *Environ Microbiol*  
643 7:853–859. doi: 10.1111/j.1462-2920.2005.00758.x
- 644 Rutherford S, D’Hondt S, Prell W (1999) Environmental controls on the geographic distribution  
645 of zooplankton diversity. *Nature* 400:749–753. doi: 10.1038/23449
- 646 Siegel V, Reiss CS, Dietrich KS, Haraldsson M, Rohardt G (2013) Distribution and abundance  
647 of Antarctic krill (*Euphausia superba*) along the Antarctic Peninsula. *Deep Res Part I*  
648 *Oceanogr Res Pap* 77:63–74. doi: 10.1016/j.dsr.2013.02.005
- 649 Stoeck T, Bass D, Nebel M, Christen R, Jones MDM, Breiner HW, Richards TA (2010) Multiple  
650 marker parallel tag environmental DNA sequencing reveals a highly complex eukaryotic  
651 community in marine anoxic water. *Mol Ecol* 19:21–31. doi: 10.1111/j.1365-  
652 294X.2009.04480.x
- 653 Takasuka A, Oozeki Y, Kubota H, Tsuruta Y, Funamoto T (2005) Temperature impacts on  
654 reproductive parameters for Japanese anchovy: Comparison between inshore and offshore  
655 waters. *Fish Res* 76:475–482. doi: 10.1016/j.fishres.2005.07.003
- 656 Tremblay P, Gori A, Maguer JF, Hoogenboom M, Ferrier-Pagès C (2016) Heterotrophy  
657 promotes the re-establishment of photosynthate translocation in a symbiotic coral after heat  
658 stress. *Sci Rep* 6:38112. doi: 10.1038/srep38112
- 659 Varela M, Prego R, Belzunce MJ, Salas FM (2001) Inshore-offshore differences in seasonal  
660 variations of phytoplankton assemblages: The case of a Galician Ria Alta (Ria de A  
661 Coruña) and its adjacent shelf (NW of Spain). *Cont Shelf Res.* doi: 10.1016/S0278-  
662 4343(01)00032-2
- 663 Weider LJ, Elser JJ, Crease TJ, Mateos M, Cotner JB, Markow TA (2005) The Functional  
664 Significance of Ribosomal (r)DNA Variation: Impacts on the Evolutionary Ecology of  
665 Organisms. *Annu Rev Ecol Evol Syst* 36:219–242. doi:  
666 10.1146/annurev.ecolsys.36.102003.152620
- 667
